# Supplementary material
Source: PubMed Central journal article supplement (PMC2885503)
Supplement: NIHMS169541-supplement-1.pdf [file NIHMS169541-supplement-1.pdf]

**FIGURE 1S.**

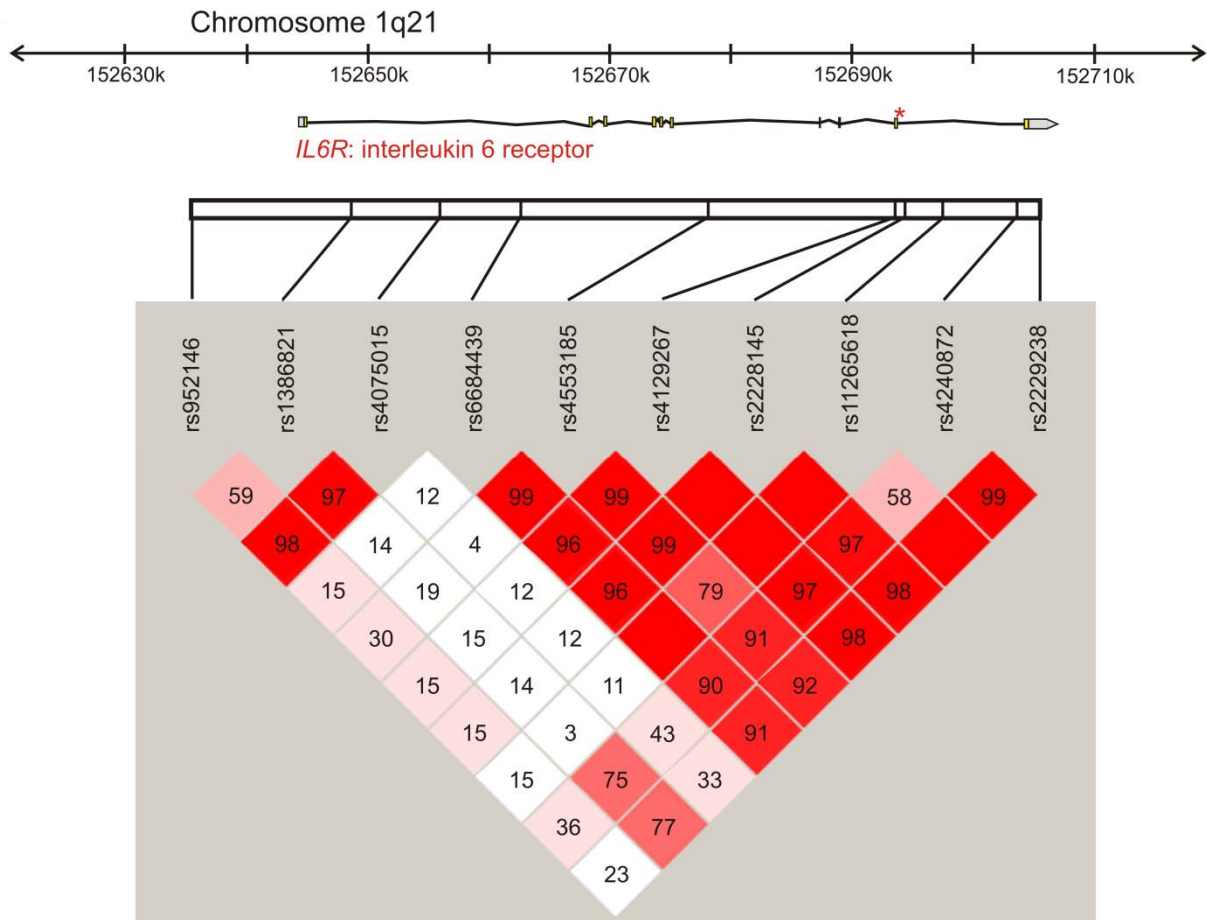

**Figure 1S.** The LD pattern of the interleukin 6 receptor gene (*IL6R*) based on results from tag-SNP genotyping in the GOOD cohort. The location of each tested SNP along the chromosome is indicated on top and the number in each square indicates the magnitude of linkage disequilibrium (LD) expressed as  $D'$  between respective pairs of SNPs. *Color scheme:* bright red squares indicate strong LD ( $D' \approx 1$ ); squares colored by lighter shades of pink indicate weaker LD; white color indicates very weak or no LD ( $D' \approx 0$ ). Modified from Haploview (37)
