# Supplementary material
Source: PubMed Central journal article supplement (PMC2885503)
Supplement: NIHMS169541-supplement-2.pdf [file NIHMS169541-supplement-2.pdf]

**TABLE 1S.** Allele and genotype frequencies of tag-SNPs in the *IL6R* gene (GOOD)

| Marker     | Gene        | Localization | Allele frequency |        | Genotype frequency |          |          | $P_{HWE}$ |
|------------|-------------|--------------|------------------|--------|--------------------|----------|----------|-----------|
|            |             |              | 1                | 2      | 11                 | 12       | 22       |           |
|            |             |              | %                | %      | n (%)              | n (%)    | n (%)    |           |
| rs952146   | <i>IL6R</i> | 5' near gene | 62 (A)           | 38 (G) | 431 (40)           | 469 (44) | 148 (14) | 0.26      |
| rs1386821  | <i>IL6R</i> | intron 1     | 84 (T)           | 16 (G) | 738 (69)           | 278 (26) | 33 (3)   | 0.28      |
| rs4075015  | <i>IL6R</i> | intron 1     | 56 (A)           | 44 (T) | 346 (32)           | 507 (47) | 193 (18) | 0.76      |
| rs6684439  | <i>IL6R</i> | intron 1     | 95 (C)           | 41 (T) | 378 (35)           | 507 (47) | 164 (15) | 0.78      |
| rs4553185  | <i>IL6R</i> | intron 6     | 57 (T)           | 43 (C) | 327 (31)           | 531 (50) | 191 (18) | 0.34      |
| rs4129267  | <i>IL6R</i> | intron 8     | 59 (C)           | 41 (T) | 378 (35)           | 501 (47) | 170 (16) | 0.85      |
| rs2228145* | <i>IL6R</i> | 3' near gene | 59 (A)           | 41 (C) | 378 (35)           | 498 (47) | 168 (16) | 0.85      |
| rs11265618 | <i>IL6R</i> | 3' near gene | 81 (C)           | 19 (T) | 718 (67)           | 302 (28) | 27 (3)   | 0.47      |
| rs4240872  | <i>IL6R</i> | 3' near gene | 76 (T)           | 24 (C) | 592 (55)           | 397 (37) | 60 (6)   | 0.54      |
| rs2229238  | <i>IL6R</i> | 3' near gene | 79 (C)           | 21 (T) | 667 (62)           | 343 (32) | 39 (4)   | 0.53      |

**Table 1S.** 1 = major allele; 2 = minor allele; n = number of subjects carrying the genotype; 11 = homozygotes for major allele; 22 = homozygotes for minor allele; HWE = Hardy-Weinberg equilibrium; IL = interleukin; R = receptor; \*rs2228145 is also known as rs8192284.

**TABLE 2S.** Associations with total fat mass and the covariates used for adjustments with fat parameters in the three cohorts

| <b>Cohort</b> | <b>Covariates</b>                  | <b>Effect size*</b> | <b>P</b>            |
|---------------|------------------------------------|---------------------|---------------------|
| GOOD          | Current physical activity (h/week) | -0.021 ± 0.006      | 0.0003              |
|               | Total body lean mass (kg)          | 0.046 ± 0.006       | 1×10 <sup>-13</sup> |
| MrOS          | Age (yr)                           | 0.002 ± 0.005       | 0.15                |
| Sweden        | Current physical activity (km/day) | -0.033 ± 0.005      | 0.0004              |
|               | Current smoking status             | -0.261 ± 0.060      | 1×10 <sup>-05</sup> |
|               | Height (cm)                        | -0.009 ± 0.003      | 0.006               |
|               | Total body lean mass (kg)          | 0.064 ± 0.003       | 8×10 <sup>-79</sup> |
| MrOS          | Age (yr)                           | 0.006 ± 0.002       | 0.14                |
| US            | Current physical activity (km/day) | -0.027 ± 0.003      | 0.0004              |
|               | Current smoking status             | -0.187 ± 0.061      | 0.002               |
|               | Height (cm)                        | -0.015 ± 0.002      | 1×10 <sup>-13</sup> |
|               | Total body lean mass (kg)          | 0.077 ± 0.002       | 1×10 <sup>-99</sup> |

**Table 2S.** Linear regression analysis of total fat mass and covariates that then were used for adjustments of associations between SNPs and fat parameters in the three cohorts. *P*-values are calculated on log-transformed response (tissue fat mass measured by DXA) using linear regression, and are adjusted for site. \*Effect size (regression coefficient) and SEM values are expressed in change in SD units of total fat mass for each covariate.

**TABLE 3S:** SNPs in the *IL6R* gene in relation to total fat mass in the GOOD cohort

| Marker     | Minor allele | <u>MODEL I</u> |                | <u>MODEL II</u> |                      |
|------------|--------------|----------------|----------------|-----------------|----------------------|
|            |              | <i>P</i>       | Effect size*   | <i>P</i>        | <i>P<sub>c</sub></i> |
| rs952146   | G            | 0.87           | -0.002 (0.043) | 0.97            | 1                    |
| rs1386821  | G            | 0.10           | -0.069 (0.056) | 0.22            | 0.73                 |
| rs4075015  | T            | 0.02           | -0.092 (0.042) | 0.03            | 0.17                 |
| rs6684439  | T            | 0.71           | 0.022 (0.043)  | 0.61            | 1                    |
| rs4553185  | C            | 0.24           | -0.053 (0.043) | 0.22            | 0.82                 |
| rs4129267  | T            | 0.40           | 0.039 (0.043)  | 0.36            | 0.9                  |
| rs2228145* | C            | 0.41           | 0.040 (0.043)  | 0.35            | 0.9                  |
| rs11265618 | T            | 0.82           | 0.004 (0.057)  | 0.94            | 1                    |
| rs4240872  | C            | 0.32           | -0.062 (0.049) | 0.21            | 0.81                 |
| rs2229238  | T            | 0.47           | 0.057 (0.053)  | 0.28            | 0.91                 |

**Table 3S.** *P*-values are calculated on log-transformed response (tissue fat mass measured by DXA) using linear regression under an additive model, corrected for race, tissue lean mass and present physical activity (hours per week). Model I is adjusted for race and Model II is adjusted for race, tissue lean mass and present physical activity (hours per week). \*Effect size (regression coefficient) and SEM values are expressed as change in SD units per additional minor allele and presented for the model II. *P<sub>c</sub>* is corrected for multiple testing by permutation test. \*rs2228145 is also known as rs8192284.
